# Supplementary material
Source: publisher site journal article supplement (https://www.dovepress.com/article/363862)
Supplement: Supplementary file 1 [file get_supplementary_file.php]

**Supplementary Figures**

**Supplementary Figure 1**


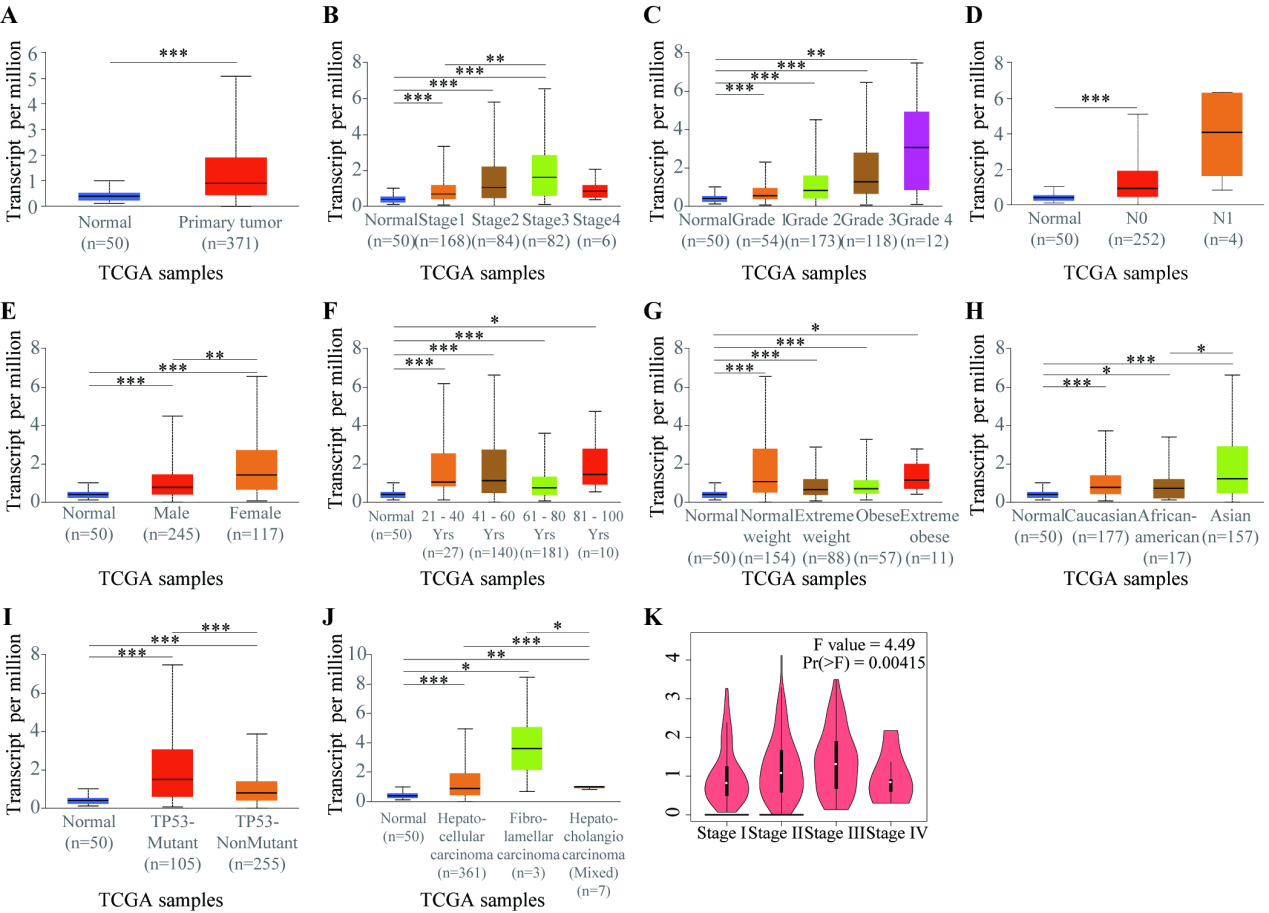


**Supplementary Figure 1** Relationship between KRBA1 expression and clinical features from UALCAN database and GEPIA database. (**A**) sample types; (**B**) cancer stage; (**C**) tumor grade; (**D**) nodal metastasis status; (**E**) patient’ s gender; (**F**) patient’ s age; (**G**) patient’ s weight; (**H**) patient’ s race; (**I**) TP53 mutation status; (**J**) histological subtypes; (**K**) cancer stage (GEPIA). ***P<0.001,**P<0.01,*P<0.05.

**Supplementary Figure 2**


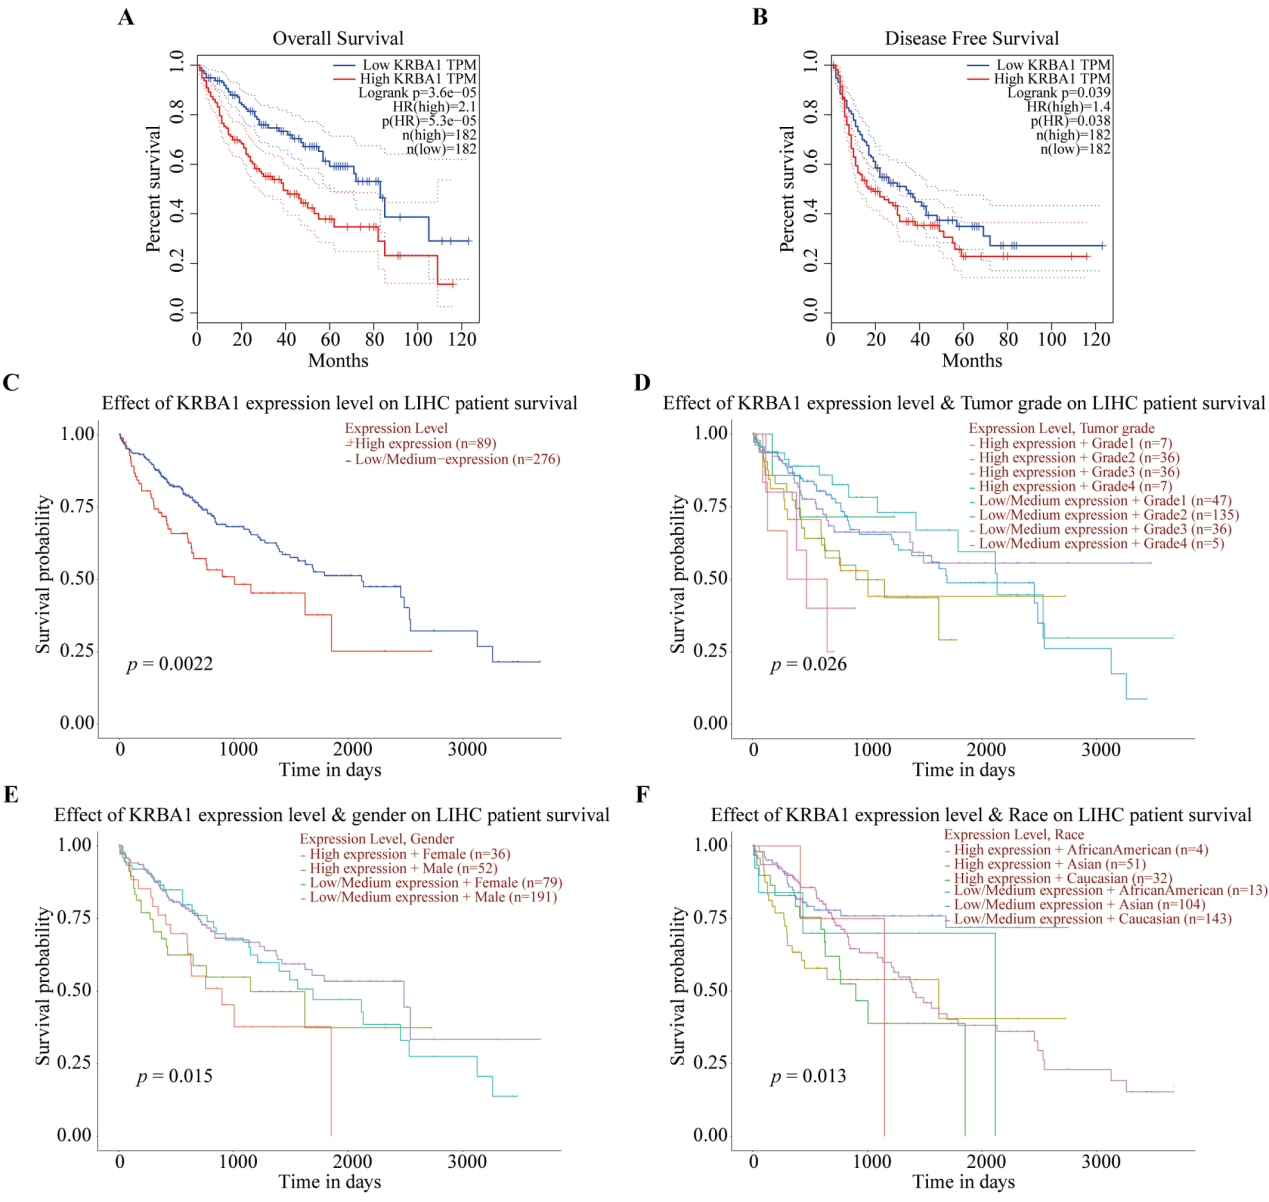


**Supplementary Figure 2** KRBA1 expression affects the prognosis of LIHC patients. (**A**) Relationship between KRBA1 expression and OS based on GEPIA database. (**B**) Relationship between KRBA1 expression and DFS based on GEPIA database. (**C-F**) Relationship between expression of KRBA1 subgroups and OS based on UALCAN database.

**Supplementary Figure 3**


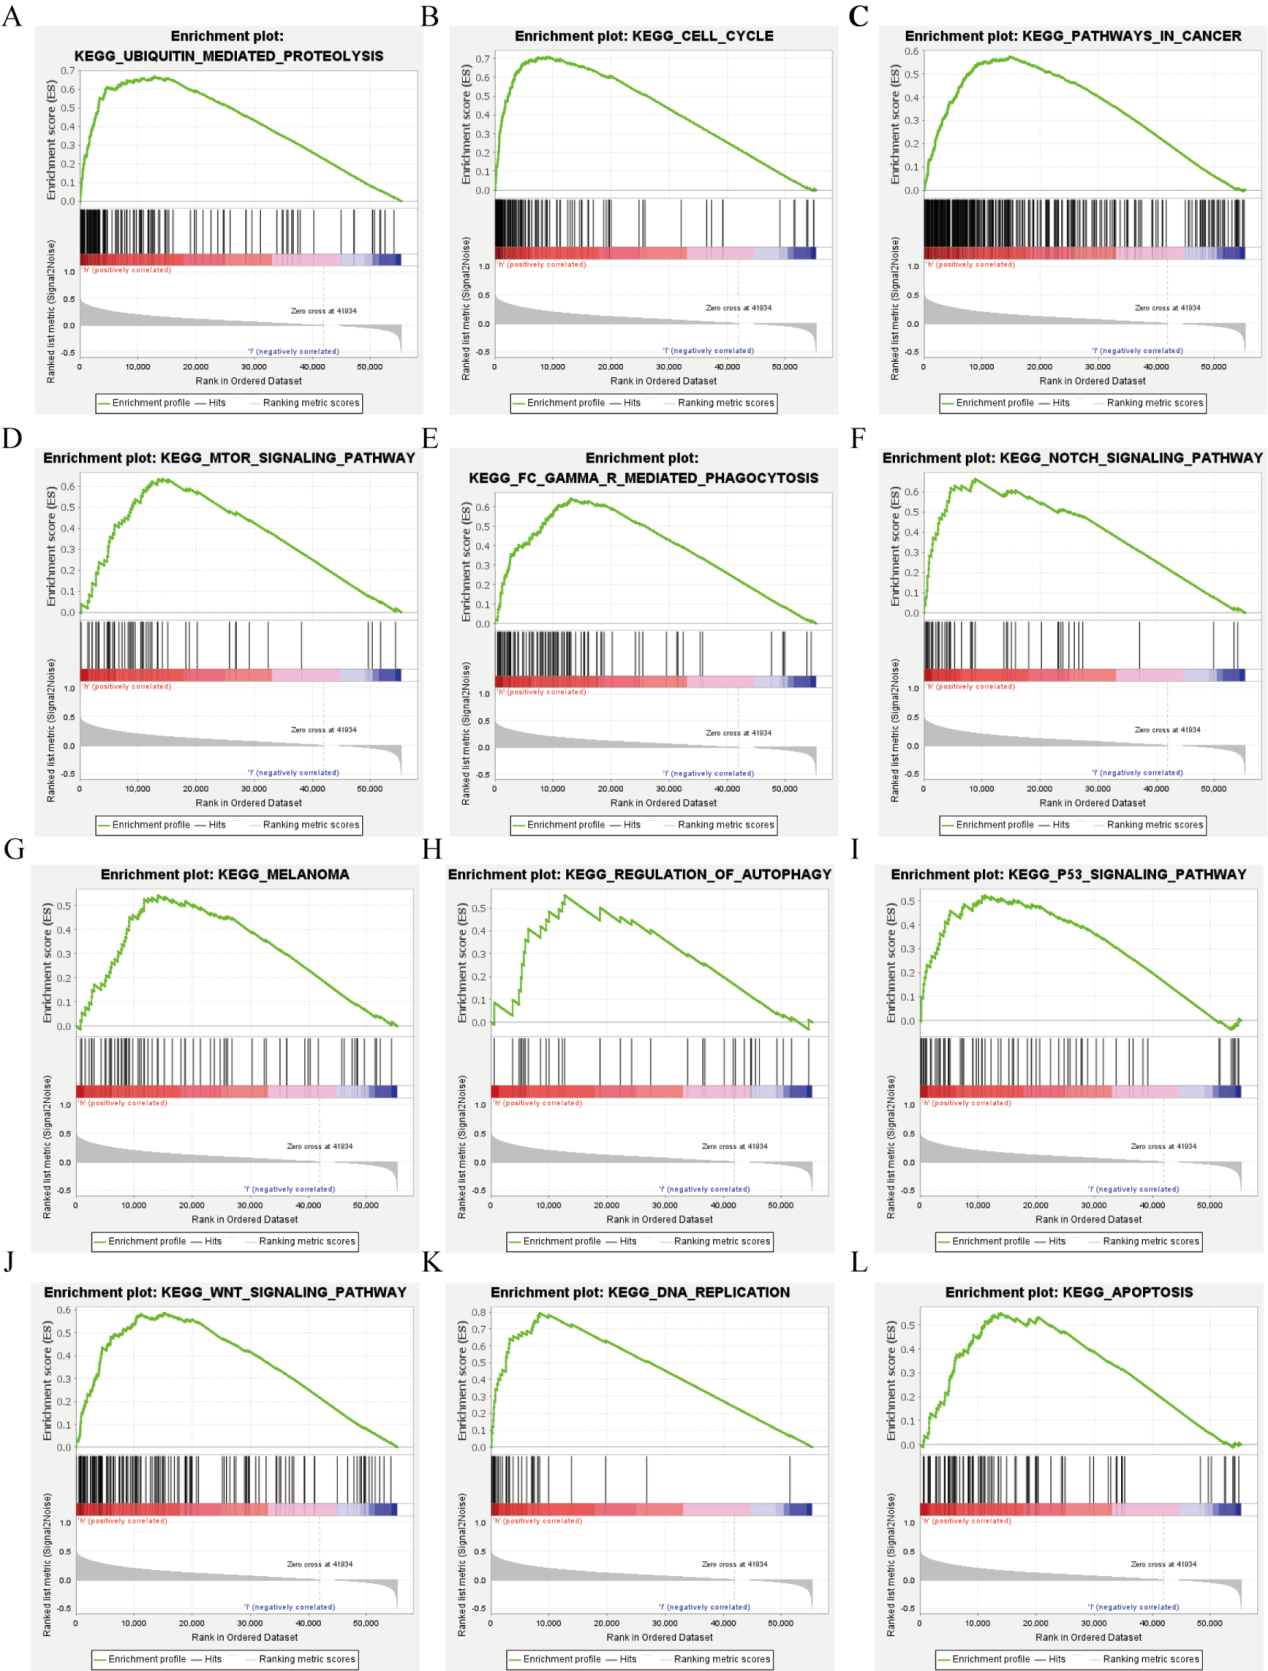


**Supplementary Figure 3** GSEA analysis revealed the pathway based on expression in the TCGA LIHC dataset. (**A**) UBIQUITIN MEDIATED PROTEOLYSIS. (**B**) CELL CYCLE. (**C**)PATHWAYS IN CANCER. (**D**) MTOR SIGNALING PATHWAY. (**E**) FC GAMMA R MEDIATED PHAGOCYTOSIS. (**F**) NOTCH SIGNALING PATHWAY. (**G**) MELANOMA. (**H**) REGULATION OF AUTOPHAGY. (**I**) P53 SIGNALING PATHWAY. (**J**) WNT SIGNALING PATHWAY. (**K**) DNA REPLICATION.

**Supplementary Tables**

| **Supplementary Table 1:** KRBA1 expression associated with clinical pathological characteristics (logistic regression). | | | |
| --- | --- | --- | --- |
| **Clinical characteristics** | **Total** | **odds ratio in** | **P value** |
| **（N）** | **KRBA1 expression** |
| age(<=61 vs >61) | 235 | 0.44（0.26-0.75） | **0.003** |
| Gender(Female vs Male) | 235 | 2.26（1.29-4.03） | **0.005** |
| Stage(I vs Ⅲ） | 235 | 1.90（0.97-3.76） | **8.32e-06** |
| T stage(T0 vs T1) | 235 | 1.73（1.31-2.34） | **0.000** |
| N stage(N0 vs N1) | 235 | 3.08（0.39-62.74） | 0.333 |
| M stage(M0 vs M1) | 235 | 1.01（0.12-8.52） | 0.993 |

**Note:** Bold values indicate P<0.05.

| **Supplementary Table 2:** Gene sets enriched in phenotype(187 samples). | | | | | | | |
| --- | --- | --- | --- | --- | --- | --- | --- |
|  | **GS** | **SIZE** | **ES** | **NES** | **NOM p-val** | **FDR q-val** | **FWER p-val** |
| 1 | KEGG_OOCYTE_MEIOSIS | 112 | 0.65 | 2.12 | 0 | 0.006 | 0.003 |
| 2 | KEGG_UBIQUITIN_MEDIATED_PROTEOLYSIS | 134 | 0.67 | 2.05 | 0 | 0.011 | 0.01 |
| 3 | KEGG_CELL_CYCLE | 124 | 0.71 | 2.04 | 0 | 0.008 | 0.011 |
| 4 | KEGG_PATHWAYS_IN_CANCER | 325 | 0.57 | 2.02 | 0 | 0.009 | 0.015 |
| 5 | KEGG_REGULATION_OF_ACTIN_CYTOSKELETON | 213 | 0.59 | 2.01 | 0 | 0.009 | 0.017 |
| 6 | KEGG_ADHERENS_JUNCTION | 73 | 0.65 | 1.98 | 0 | 0.011 | 0.024 |
| 7 | KEGG_WNT_SIGNALING_PATHWAY | 150 | 0.59 | 1.97 | 0 | 0.012 | 0.034 |
| 8 | KEGG_PANCREATIC_CANCER | 70 | 0.66 | 1.96 | 0 | 0.012 | 0.037 |
| 9 | KEGG_GNRH_SIGNALING_PATHWAY | 101 | 0.58 | 1.96 | 0 | 0.011 | 0.037 |
| 10 | KEGG_SPLICEOSOME | 127 | 0.73 | 1.96 | 0 | 0.01 | 0.037 |
| 11 | KEGG_PHOSPHATIDYLINOSITOL_SIGNALING_SYSTEM | 76 | 0.65 | 1.95 | 0 | 0.01 | 0.041 |
| 12 | KEGG_LONG_TERM_POTENTIATION | 70 | 0.6 | 1.95 | 0 | 0.009 | 0.042 |
| 13 | KEGG_GAP_JUNCTION | 90 | 0.62 | 1.95 | 0 | 0.009 | 0.042 |
| 14 | KEGG_ENDOCYTOSIS | 181 | 0.58 | 1.95 | 0 | 0.008 | 0.045 |
| 15 | KEGG_MTOR_SIGNALING_PATHWAY | 52 | 0.63 | 1.95 | 0 | 0.008 | 0.045 |
| 16 | KEGG_FC_GAMMA_R_MEDIATED_PHAGOCYTOSIS | 96 | 0.64 | 1.95 | 0.002 | 0.007 | 0.046 |
| 17 | KEGG_RENAL_CELL_CARCINOMA | 70 | 0.64 | 1.94 | 0 | 0.007 | 0.047 |
| 18 | KEGG_PURINE_METABOLISM | 156 | 0.54 | 1.94 | 0 | 0.007 | 0.05 |
| 19 | KEGG_PROGESTERONE_MEDIATED_OOCYTE_MATURATION | 85 | 0.61 | 1.93 | 0 | 0.007 | 0.055 |
| 20 | KEGG_GLIOMA | 65 | 0.59 | 1.93 | 0 | 0.007 | 0.055 |
| 21 | KEGG_COLORECTAL_CANCER | 62 | 0.63 | 1.93 | 0 | 0.007 | 0.057 |
| 22 | KEGG_NOTCH_SIGNALING_PATHWAY | 47 | 0.66 | 1.92 | 0 | 0.007 | 0.06 |
| 23 | KEGG_PROSTATE_CANCER | 89 | 0.59 | 1.92 | 0 | 0.007 | 0.062 |
| 24 | KEGG_NUCLEOTIDE_EXCISION_REPAIR | 44 | 0.69 | 1.92 | 0 | 0.007 | 0.064 |
| 25 | KEGG_NEUROTROPHIN_SIGNALING_PATHWAY | 126 | 0.61 | 1.91 | 0 | 0.007 | 0.068 |
| 26 | KEGG_MISMATCH_REPAIR | 23 | 0.81 | 1.91 | 0 | 0.007 | 0.068 |
| 27 | KEGG_CHRONIC_MYELOID_LEUKEMIA | 73 | 0.63 | 1.91 | 0 | 0.007 | 0.069 |
| 28 | KEGG_MAPK_SIGNALING_PATHWAY | 267 | 0.53 | 1.9 | 0 | 0.007 | 0.072 |
| 29 | KEGG_SPHINGOLIPID_METABOLISM | 39 | 0.62 | 1.9 | 0 | 0.007 | 0.072 |
| 30 | KEGG_SMALL_CELL_LUNG_CANCER | 84 | 0.61 | 1.9 | 0 | 0.007 | 0.077 |
| 31 | KEGG_INOSITOL_PHOSPHATE_METABOLISM | 54 | 0.64 | 1.88 | 0 | 0.008 | 0.094 |
| 32 | KEGG_VASOPRESSIN_REGULATED_WATER_REABSORPTION | 44 | 0.63 | 1.88 | 0.004 | 0.008 | 0.098 |
| 33 | KEGG_ERBB_SIGNALING_PATHWAY | 87 | 0.59 | 1.87 | 0.002 | 0.008 | 0.1 |
| 34 | KEGG_BASE_EXCISION_REPAIR | 35 | 0.67 | 1.87 | 0 | 0.008 | 0.101 |
| 35 | KEGG_PATHOGENIC_ESCHERICHIA_COLI_INFECTION | 56 | 0.64 | 1.87 | 0.004 | 0.008 | 0.104 |
| 36 | KEGG_PYRIMIDINE_METABOLISM | 97 | 0.56 | 1.86 | 0.002 | 0.009 | 0.107 |
| 37 | KEGG_TIGHT_JUNCTION | 132 | 0.54 | 1.86 | 0 | 0.009 | 0.109 |
| 38 | KEGG_N_GLYCAN_BIOSYNTHESIS | 46 | 0.62 | 1.86 | 0 | 0.009 | 0.114 |
| 39 | KEGG_VEGF_SIGNALING_PATHWAY | 76 | 0.55 | 1.86 | 0 | 0.009 | 0.115 |
| 40 | KEGG_MELANOGENESIS | 101 | 0.55 | 1.86 | 0 | 0.009 | 0.116 |
| 41 | KEGG_NON_SMALL_CELL_LUNG_CANCER | 54 | 0.6 | 1.85 | 0.002 | 0.009 | 0.121 |
| 42 | KEGG_HOMOLOGOUS_RECOMBINATION | 28 | 0.74 | 1.85 | 0.004 | 0.009 | 0.122 |
| 43 | KEGG_AXON_GUIDANCE | 129 | 0.57 | 1.84 | 0 | 0.009 | 0.129 |
| 44 | KEGG_FOCAL_ADHESION | 199 | 0.57 | 1.84 | 0.006 | 0.009 | 0.129 |
| 45 | KEGG_DNA_REPLICATION | 36 | 0.79 | 1.84 | 0.002 | 0.009 | 0.138 |
| 46 | KEGG_NOD_LIKE_RECEPTOR_SIGNALING_PATHWAY | 62 | 0.61 | 1.83 | 0.002 | 0.01 | 0.144 |
| 47 | KEGG_GLYCOSYLPHOSPHATIDYLINOSITOL_GPI_ANCHOR_BIOSYNTHESIS | 25 | 0.67 | 1.83 | 0.002 | 0.01 | 0.147 |
| 48 | KEGG_ENDOMETRIAL_CANCER | 52 | 0.6 | 1.83 | 0 | 0.01 | 0.151 |
| 49 | KEGG_RNA_DEGRADATION | 59 | 0.63 | 1.82 | 0.002 | 0.01 | 0.155 |
| 50 | KEGG_MELANOMA | 71 | 0.54 | 1.82 | 0.002 | 0.011 | 0.164 |
| 51 | KEGG_BLADDER_CANCER | 42 | 0.6 | 1.81 | 0 | 0.011 | 0.176 |
| 52 | KEGG_LEUKOCYTE_TRANSENDOTHELIAL_MIGRATION | 116 | 0.55 | 1.79 | 0.004 | 0.014 | 0.206 |
| 53 | KEGG_FC_EPSILON_RI_SIGNALING_PATHWAY | 79 | 0.55 | 1.79 | 0.002 | 0.014 | 0.21 |
| 54 | KEGG_EPITHELIAL_CELL_SIGNALING_IN_HELICOBACTER_PYLORI_INFECTION | 68 | 0.57 | 1.79 | 0.002 | 0.014 | 0.21 |
| 55 | KEGG_TGF_BETA_SIGNALING_PATHWAY | 85 | 0.56 | 1.79 | 0.004 | 0.013 | 0.211 |
| 56 | KEGG_TOLL_LIKE_RECEPTOR_SIGNALING_PATHWAY | 102 | 0.56 | 1.79 | 0.004 | 0.013 | 0.217 |
| 57 | KEGG_RIG_I_LIKE_RECEPTOR_SIGNALING_PATHWAY | 70 | 0.55 | 1.78 | 0.004 | 0.014 | 0.223 |
| 58 | KEGG_GLYCOSPHINGOLIPID_BIOSYNTHESIS_LACTO_AND_NEOLACTO_SERIES | 26 | 0.6 | 1.78 | 0.002 | 0.014 | 0.23 |
| 59 | KEGG_THYROID_CANCER | 29 | 0.62 | 1.77 | 0.002 | 0.015 | 0.235 |
| 60 | KEGG_VIBRIO_CHOLERAE_INFECTION | 54 | 0.56 | 1.77 | 0.011 | 0.015 | 0.239 |
| 61 | KEGG_INSULIN_SIGNALING_PATHWAY | 137 | 0.49 | 1.76 | 0.004 | 0.016 | 0.255 |
| 62 | KEGG_REGULATION_OF_AUTOPHAGY | 35 | 0.56 | 1.76 | 0.006 | 0.017 | 0.267 |
| 63 | KEGG_P53_SIGNALING_PATHWAY | 68 | 0.52 | 1.75 | 0.01 | 0.018 | 0.289 |
| 64 | KEGG_APOPTOSIS | 87 | 0.55 | 1.74 | 0.006 | 0.019 | 0.305 |
| 65 | KEGG_GLYCEROPHOSPHOLIPID_METABOLISM | 77 | 0.49 | 1.74 | 0 | 0.019 | 0.305 |
| 66 | KEGG_LYSOSOME | 121 | 0.54 | 1.71 | 0.014 | 0.025 | 0.367 |
| 67 | KEGG_DORSO_VENTRAL_AXIS_FORMATION | 24 | 0.63 | 1.7 | 0.016 | 0.025 | 0.367 |
| 68 | KEGG_B_CELL_RECEPTOR_SIGNALING_PATHWAY | 75 | 0.57 | 1.7 | 0.015 | 0.026 | 0.377 |
| 69 | KEGG_ACUTE_MYELOID_LEUKEMIA | 57 | 0.56 | 1.7 | 0.01 | 0.026 | 0.377 |
| 70 | KEGG_LONG_TERM_DEPRESSION | 70 | 0.51 | 1.7 | 0.004 | 0.026 | 0.378 |
| 71 | KEGG_JAK_STAT_SIGNALING_PATHWAY | 155 | 0.5 | 1.68 | 0.015 | 0.029 | 0.413 |
| 72 | KEGG_BASAL_TRANSCRIPTION_FACTORS | 35 | 0.6 | 1.66 | 0.01 | 0.033 | 0.449 |
| 73 | KEGG_T_CELL_RECEPTOR_SIGNALING_PATHWAY | 108 | 0.56 | 1.66 | 0.031 | 0.034 | 0.456 |
| 74 | KEGG_GLYCOSAMINOGLYCAN_BIOSYNTHESIS_CHONDROITIN_SULFATE | 22 | 0.63 | 1.66 | 0.023 | 0.033 | 0.46 |
| 75 | KEGG_SNARE_INTERACTIONS_IN_VESICULAR_TRANSPORT | 38 | 0.55 | 1.64 | 0.015 | 0.037 | 0.49 |
| 76 | KEGG_CYTOSOLIC_DNA_SENSING_PATHWAY | 54 | 0.53 | 1.62 | 0.012 | 0.045 | 0.558 |
| 77 | KEGG_VASCULAR_SMOOTH_MUSCLE_CONTRACTION | 114 | 0.48 | 1.62 | 0.027 | 0.045 | 0.56 |
| 78 | KEGG_HEDGEHOG_SIGNALING_PATHWAY | 56 | 0.51 | 1.61 | 0.013 | 0.047 | 0.58 |
| 79 | KEGG_ARRHYTHMOGENIC_RIGHT_VENTRICULAR_CARDIOMYOPATHY_ARVC | 74 | 0.51 | 1.61 | 0.021 | 0.047 | 0.581 |
| 80 | KEGG_ETHER_LIPID_METABOLISM | 33 | 0.5 | 1.61 | 0.022 | 0.047 | 0.584 |

**Note:** Gene sets with NOM p-value < 0.05 and FDR q-value < 0.05 are considered as significant.

**Abbreviations:** NES: normalized enrichment score; NOM: nominal; FDR: false discovery rate.

| **Supplementary Table 3:** Gene sets enriched in phenotype(187 samples). | | | | | | | |
| --- | --- | --- | --- | --- | --- | --- | --- |
|  | **GS** | **SIZE** | **ES** | **NES** | **NOM p-val** | **FDR q-val** | **FWER p-val** |
| 1 | KEGG_RETINOL_METABOLISM | 64 | -0.73 | -2.17 | 0 | 0 | 0.001 |
| 2 | KEGG_DRUG_METABOLISM_CYTOCHROME_P450 | 71 | -0.7 | -2.09 | 0 | 0.002 | 0.008 |
| 3 | KEGG_TRYPTOPHAN_METABOLISM | 39 | -0.75 | -2.08 | 0 | 0.001 | 0.009 |
| 4 | KEGG_FATTY_ACID_METABOLISM | 42 | -0.84 | -2.07 | 0 | 0.001 | 0.01 |
| 5 | KEGG_PRIMARY_BILE_ACID_BIOSYNTHESIS | 16 | -0.92 | -2.03 | 0 | 0.002 | 0.023 |
| 6 | KEGG_STEROID_HORMONE_BIOSYNTHESIS | 55 | -0.65 | -2.01 | 0 | 0.002 | 0.025 |
| 7 | KEGG_METABOLISM_OF_XENOBIOTICS_BY_CYTOCHROME_P450 | 69 | -0.66 | -2 | 0.002 | 0.002 | 0.027 |
| 8 | KEGG_GLYCINE_SERINE_AND_THREONINE_METABOLISM | 31 | -0.76 | -1.99 | 0 | 0.002 | 0.031 |
| 9 | KEGG_VALINE_LEUCINE_AND_ISOLEUCINE_DEGRADATION | 43 | -0.8 | -1.98 | 0 | 0.002 | 0.033 |
| 10 | KEGG_COMPLEMENT_AND_COAGULATION_CASCADES | 69 | -0.71 | -1.98 | 0.002 | 0.002 | 0.033 |
| 11 | KEGG_PEROXISOME | 78 | -0.6 | -1.84 | 0.012 | 0.01 | 0.107 |
| 12 | KEGG_BUTANOATE_METABOLISM | 34 | -0.68 | -1.83 | 0.002 | 0.012 | 0.129 |
| 13 | KEGG_BETA_ALANINE_METABOLISM | 22 | -0.7 | -1.82 | 0.008 | 0.012 | 0.139 |
| 14 | KEGG_TYROSINE_METABOLISM | 42 | -0.57 | -1.79 | 0.008 | 0.015 | 0.173 |
| 15 | KEGG_ARGININE_AND_PROLINE_METABOLISM | 54 | -0.53 | -1.79 | 0.002 | 0.014 | 0.173 |
| 16 | KEGG_PPAR_SIGNALING_PATHWAY | 69 | -0.55 | -1.76 | 0.004 | 0.019 | 0.242 |
| 17 | KEGG_ASCORBATE_AND_ALDARATE_METABOLISM | 25 | -0.67 | -1.72 | 0.021 | 0.026 | 0.322 |
| 18 | KEGG_PROPANOATE_METABOLISM | 32 | -0.67 | -1.71 | 0.014 | 0.026 | 0.338 |
| 19 | KEGG_PHENYLALANINE_METABOLISM | 18 | -0.63 | -1.7 | 0.01 | 0.027 | 0.361 |
| 20 | KEGG_DRUG_METABOLISM_OTHER_ENZYMES | 51 | -0.51 | -1.7 | 0.013 | 0.027 | 0.37 |
| 21 | KEGG_LINOLEIC_ACID_METABOLISM | 29 | -0.5 | -1.51 | 0.037 | 0.095 | 0.736 |
| 22 | KEGG_ALANINE_ASPARTATE_AND_GLUTAMATE_METABOLISM | 30 | -0.48 | -1.51 | 0.037 | 0.096 | 0.749 |

**Note:** Gene sets with NOM p-value < 0.05 and FDR q-value < 0.05 are considered as significant.

**Abbreviations:** NES: normalized enrichment score; NOM: nominal; FDR: false discovery rate.

| **Supplementary Table 4:** Correlation analysis between KRBA1 and gene markers of different types of immune cells in TIMER. | | | | | |
| --- | --- | --- | --- | --- | --- |
| **Dercriplion** | **Gene markers** | **LIHC** | | | |
| **None** | | **Purity** | |
| **Cor** | **p** | **Cor** | **p** |
| **B cell** | 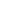CD19 | 3.01E-01 | **3.51E-09** | 3.01E-01 | **1.19E-08** |
| CD79A | 2.29E-01 | **8.23E-06** | 2.42E-01 | **5.56E-06** |
| **T cell (general)** | CD3D | 2.60E-01 | **4.26E-07** | 2.68E-01 | **4.30E-07** |
| CD3E | 2.50E-01 | **1.13E-06** | 2.73E-01 | **2.47E-07** |
| CD2 | 2.45E-01 | **1.85E-06** | 2.66E-01 | **5.15E-07** |
| **CD8+ T cell** | CD8A | 1.87E-01 | **2.94E-04** | 1.95E-01 | **2.66E-04** |
| CD8B | 1.76E-01 | **6.63E-04** | 1.82E-01 | **6.88E-04** |
| **Monocyte** | CD86 | 3.31E-01 | **8.15E-11** | 3.59E-01 | **6.64E-12** |
| CSF1R | 2.56E-01 | **6.20E-07** | 2.74E-01 | **2.40E-07** |
| **TAM** | CCL2 | 2.43E-01 | **2.40E-06** | 2.40E-01 | **6.84E-06** |
| CD68 | 2.78E-01 | **5.65E-08** | 2.74E-01 | **2.41E-07** |
| IL10 | 2.76E-01 | **6.67E-08** | 2.90E-01 | **4.21E-08** |
| **M1** | IRF5 | 3.92E-01 | **4.55E-15** | 3.85E-01 | **1.32E-13** |
| PTGS2 | 2.77E-01 | **6.03E-08** | 2.93E-01 | **2.84E-08** |
| **M2** | CD163 | 1.06E-01 | **4.22E-02** | 9.53E-02 | 7.72E-02 |
| VSIG4 | 1.52E-01 | **3.32E-03** | 1.49E-01 | **5.56E-03** |
| MS4A4A | 1.24E-01 | **1.69E-02** | 1.22E-01 | **2.29E-02** |
| **Neutrophils** | CEACAM8 | 1.43E-01 | **5.95E-03** | 1.42E-01 | **8.34E-03** |
| ITGAM | 2.29E-01 | **9.19E-06** | 2.39E-01 | **6.94E-06** |
| CCR7 | 2.12E-01 | **3.70E-05** | 2.30E-01 | **1.67E-05** |
| **Natural killer cell** | KIR2DL1 | **2.56E-02** | 6.23E-01 | **-1.26E-02** | 8.16E-01 |
| KIR2DL3 | 1.47E-01 | **4.44E-03** | 1.46E-01 | **6.45E-03** |
| KIR2DL4 | 8.84E-02 | 8.91E-02 | 8.05E-02 | 1.36E-01 |
| KIR3DL1 | **-1.84E-02** | 7.23E-01 | **-1.13E-02** | 8.35E-01 |
| KIR3DL2 | 1.03E-01 | **4.68E-02** | 9.97E-02 | 6.43E-02 |
| KIR3DL3 | **3.46E-02** | 5.07E-01 | **1.47E-02** | 7.86E-01 |
| **Dendritic cell** | HLA-DPB1 | 2.49E-01 | **1.29E-06** | 2.48E-01 | **3.25E-06** |
| HLA-DQB1 | 1.81E-01 | **4.71E-04** | 1.61E-01 | **2.79E-03** |
| HLA-DRA | 2.33E-01 | **6.30E-06** | 2.37E-01 | **8.69E-06** |
| HLA-DPA1 | 2.24E-01 | **1.35E-05** | 2.31E-01 | **1.44E-05** |
| CD1C | 3.09E-01 | **1.12E-09** | 2.94E-01 | **2.68E-08** |
| NRP1 | 3.38E-01 | **3.07E-11** | 3.24E-01 | **6.73E-10** |
| ITGAX | 3.53E-01 | **3.64E-12** | 3.75E-01 | **5.73E-13** |
| **Th1** | TBX21 | 1.14E-01 | **2.85E-02** | 1.06E-01 | **4.88E-02** |
| STAT4 | 2.55E-01 | **6.92E-07** | 2.65E-01 | **5.98E-07** |
| STAT1 | 3.53E-01 | **3.36E-12** | 3.63E-01 | **3.44E-12** |
| TNF | 2.84E-01 | **2.60E-08** | 3.18E-01 | **1.60E-09** |
| IFNG | 1.38E-01 | **7.61E-03** | 1.48E-01 | **5.73E-03** |
| **Th1-like** | HAVCR2 | 3.11E-01 | **1.07E-09** | 3.46E-01 | **4.13E-11** |
| IFNG | 1.38E-01 | **7.61E-03** | 1.48E-01 | **5.73E-03** |
| CXCR3 | 2.70E-01 | **1.50E-07** | 2.75E-01 | **2.03E-07** |
| BHLHE40 | 7.92E-02 | 1.28E-01 | 9.82E-02 | 6.85E-02 |
| CD4 | 1.66E-01 | **1.33E-03** | 1.59E-01 | **2.98E-03** |
| **Th2** | STAT6 | 7.19E-02 | 1.67E-01 | 5.69E-02 | 2.92E-01 |
| STAT5A | 2.74E-01 | **8.16E-08** | 2.75E-01 | **2.05E-07** |
| **Treg** | FOXP3 | **4.20E-02** | 4.20E-01 | **3.55E-02** | 5.11E-01 |
| CCR8 | 2.92E-01 | **9.96E-09** | 3.22E-01 | **8.95E-10** |
| TGFB1 | 4.34E-01 | **0.00E+00** | 4.64E-01 | **8.20E-20** |
| **Tfh** | BCL6 | 1.94E-01 | **1.81E-04** | 2.08E-01 | **1.00E-04** |
| CXCR5 | 3.00E-01 | **3.83E-09** | 3.25E-01 | **6.29E-10** |
| **Th17** | STAT3 | 1.64E-01 | **1.59E-03** | 1.60E-01 | **2.80E-03** |
| IL17A | 5.78E-02 | 2.67E-01 | 6.03E-02 | 2.64E-01 |
| **Resting Treg** | FOXP3 | **4.20E-02** | 4.20E-01 | **3.55E-02** | 5.11E-01 |
| IL2RA | 2.70E-01 | **1.35E-07** | 2.89E-01 | **4.45E-08** |
| **Effector Treg T-cell** | FOXP3 | **4.20E-02** | 4.20E-01 | **3.55E-02** | 5.11E-01 |
| CCR8 | 2.92E-01 | **9.96E-09** | 3.22E-01 | **8.95E-10** |
| TNFRSF9 | 2.39E-01 | **3.12E-06** | 2.69E-01 | **4.02E-07** |
| **Effector T-cell** | CX3CR1 | 2.05E-01 | **7.03E-05** | 1.99E-01 | **2.04E-04** |
| FGFBP2 | **-7.68E-02** | 1.40E-01 | **-8.33E-02** | 1.22E-01 |
| FCGR3A | 1.73E-01 | **8.18E-04** | 1.72E-01 | **1.33E-03** |
| **Naïve T-cell** | CCR7 | 2.12E-01 | **3.70E-05** | 2.30E-01 | **1.67E-05** |
| SELL | 1.80E-01 | **5.14E-04** | 1.88E-01 | **4.55E-04** |
| **Effector memory T-cell** | DUSP4 | 3.26E-01 | **1.54E-10** | 3.46E-01 | **3.77E-11** |
| GZMK | 1.35E-01 | **9.06E-03** | 1.36E-01 | **1.17E-02** |
| GZMA | 1.27E-01 | **1.42E-02** | 1.25E-01 | **2.02E-02** |
| **Resident memory T-cell** | CD69 | 2.08E-01 | **5.54E-05** | 2.16E-01 | **5.05E-05** |
| CXCR6 | 1.88E-01 | **2.65E-04** | 2.01E-01 | **1.70E-04** |
| MYADM | 4.98E-01 | **0** | 5.03E-01 | **1.64E-23** |
| **General** | CCR7 | 2.12E-01 | **3.70E-05** | 2.30E-01 | **1.67E-05** |
| **Memory T-cell** | SELL | 1.80E-01 | **5.14E-04** | 1.88E-01 | **4.55E-04** |
| IL7R | 2.21E-01 | **1.76E-05** | 2.33E-01 | **1.26E-05** |
| **Exhausted T-cell** | HAVCR2 | 3.11E-01 | **1.07E-09** | 3.46E-01 | **4.13E-11** |
| LAG3 | 2.07E-01 | **6.00E-05** | 1.95E-01 | **2.60E-04** |
| CXCL13 | 1.48E-01 | **4.31E-03** | 1.62E-01 | **2.60E-03** |
| LAYN | 2.46E-01 | **1.79E-06** | 2.46E-01 | **3.81E-06** |

**Note:** Bold values indicate P<0.05.
